# Supplementary material for: Discrete gene sets depend on POU domain transcription factor Brn3b/Brn-3.2/POU4f2 for their expression in the mouse embryonic retina
Source: Oxford University Press journal article supplement (doi:10.1242/dev.01010), 2004-02-24
Supplement: dev01010-sup-supptables.pdf [file dev01010-sup-supptables.pdf]

**Table S1. Primer sets used for real-time PCR**

| Gene                             | Position           | 5'-sequence-3'                                |
|----------------------------------|--------------------|-----------------------------------------------|
| $\beta$ -Actin                   | Forward<br>Reverse | CAACGGCTCCGGCATGTGC<br>CTCTTGCTCTGGCCCTCG     |
| <i>Brn3b</i>                     | Forward<br>Reverse | TCTGGAAGCTACTTCGCCA<br>CCGGTTCACAATCTCTCTGA   |
| <i>Brn3a</i>                     | Forward<br>Reverse | AGGCCTATTTTGCCGTACAA<br>CGTCTCACACCCTCCTCAGT  |
| Gap-43                           | Forward<br>Reverse | GTGCTGCTAAAGCTACCACT<br>CTTCAGAGTGGAGCTGAGAA  |
| Persyn                           | Forward<br>Reverse | GTACAAAGTGTACCTCAGT<br>CAGCAGCATCTGATTGGTGA   |
| <i>Eaat-2/Glut1</i>              | Forward<br>Reverse | GCTCCCAAATGGTCTAGAGT<br>GTTGAGATATAGCTCTCCAT  |
| <i>Nfl</i>                       | Forward<br>Reverse | AGCTGAGGAGGCCAAGGAT<br>CCACTCTGCAAGCAAACAGA   |
| <i>Gli1</i>                      | Forward<br>Reverse | AACTTTCACCGTGGGAGTAA<br>GGCACTAGAGTTGAGGAATT  |
| Hermes                           | Forward<br>Reverse | CGAAGATGGCCAAGAACAAA<br>GGCTGTTGTGAAGTCTTGAA  |
| <i>Tau1</i>                      | Forward<br>Reverse | GCAAAGTGACCTCCAAGTGT<br>CCTGATCACAAACCCTGCTT  |
| <i>Dlx1</i>                      | Forward<br>Reverse | AGAGAGGACCAATGAGCCTT<br>CACGGTGGATTTCAATCGGT  |
| Calpactin                        | Forward<br>Reverse | CACGCCATGGAAACCATGAT<br>AAGAAGCAGTGGGGCAGATT  |
| RIKEN 1810041L15 gene<br>(RGCg1) | Forward<br>Reverse | TGGGAGGTA AACATGAGAGT<br>TCCAACCACAGCCATGAAGT |
| Ribonucleoprotein                | Forward<br>Reverse | CCCCTGATTCTGATGAGAGT<br>TTCCTGGTACACCTCAGGAT  |
| <i>Nfm</i>                       | Forward<br>Reverse | AAAGTGGTGGTCACCAAGAA<br>CAGTTCCTCATATTGCACA   |
| Cyclin D1                        | Forward<br>Reverse | GCATTTTGGTTCAGCTAGCT<br>GACATGGCCCTAAACCTTCT  |
| <i>Gig1</i>                      | Forward<br>Reverse | TGTACATAGATGCGTTCGAGT<br>AGGACTACCCAGCAAATCCT |
| Neuropilin 1                     | Forward<br>Reverse | GAGTAATTACTCAGAGGCGT<br>AGAAGAATCCACCACAGGGT  |
| Synaptotagmin 13                 | Forward<br>Reverse | CACAGCAAAGGAGCCATCT<br>GCATCTCCTCCCAGTGGCT    |
| RIKEN 2610042L04 gene            | Forward<br>Reverse | CATGGCTGTAATGGGCTGTA<br>AGCAACACTCTCCTTTTGGA  |
| <i>Nell2</i>                     | Forward<br>Reverse | CACAGATGACCTTTCCTGCT<br>CAGCACAAATGGCCATTCTT  |
| <i>Vmat2</i>                     | Forward<br>Reverse | TGCCAGCGAGCATCTCTTAT<br>CTTCCTTAGCAGGTGGACTT  |
| Synaptotagmin 4                  | Forward<br>Reverse | TGTTGTAGGTGATGGTTTCA<br>AGACCATGGTTCTTAGGTGA  |
| <i>Irx2</i>                      | Forward<br>Reverse | GTCCTTCAGAAGTGGAAACA<br>AGGTATCTCCCTGTTGTACA  |
| <i>Olf1/Ebf1</i>                 | Forward<br>Reverse | CAGCAGTGA AACAGAGAGT<br>TCAGTATTTGCAAGGTCGGT  |
| <i>Gli2</i>                      | Forward<br>Reverse | ATGCCTTGGGTTGCTGTGGA<br>CAACCTTCCGCTCAACCACA  |
| Smoothened                       | Forward<br>Reverse | CAGGCCTCTGAAAGACATGT<br>GTTCTTGAATGTGGGGCACT  |
| Patched 2                        | Forward<br>Reverse | GCATCAA ACTGAGTGCCATC<br>GTCTGTGGACTCTCCTTGTA |
| Patched                          | Forward<br>Reverse | CAGACACTCAGCTCCCTTGA<br>AGAAGCCGTCACAGTGGTGA  |
| <i>Gli3</i>                      | Forward<br>Reverse | ATCCATGGGCACCACCAACA<br>GACACATCCCAATCAGGTGA  |
| <i>Dlx2</i>                      | Forward<br>Reverse | CTTCATCCATTGCCAGTGGGA<br>AAACATAGGGACTGCTGAGG |
| Sonic hedgehog                   | Forward<br>Reverse | TGTCATCGAGGAGCACAGCT<br>AGCTGGACTTGACCGCCATT  |

**Table S2. Non-redundant list of all genes with altered expression in *brn3b*-null retina**

| Gene ID   | Gene name or matched EST                                                                                                                                        | E14.5* | E14.5 <i>t</i> -test | E16.5* | E16.5 <i>t</i> -test | E18.5* | E18.5 <i>t</i> -test |
|-----------|-----------------------------------------------------------------------------------------------------------------------------------------------------------------|--------|----------------------|--------|----------------------|--------|----------------------|
| Cluster A |                                                                                                                                                                 |        |                      |        |                      |        |                      |
| 0251-95   | (AF099986) persyn                                                                                                                                               | 13.60  | 0.000                | 10.79  | 0.030                | 4.94   | 0.001                |
| 2092-73   | Brn3b                                                                                                                                                           | 5.06   | 0.000                | 1.04   | 0.754                | 1.15   | 0.331                |
| 2061-59   | EBF/OLF1                                                                                                                                                        | 4.27   | 0.000                | 1.25   | 0.179                | 1.45   | 0.099                |
| 2042-68   | Genomic Chr 11                                                                                                                                                  | 3.99   | 0.000                | 1.54   | 0.098                | 1.62   | 0.010                |
| 2082-14   | (S59158) glutamate transporter, GluT-1                                                                                                                          | 3.83   | 0.000                | 1.72   | 0.007                | 1.29   | 0.061                |
| 4034-04   | Irx2                                                                                                                                                            | 3.81   | 0.000                | 4.90   | 0.000                | 3.33   | 0.003                |
| 2074-94   | Brn3a                                                                                                                                                           | 3.41   | 0.000                | 2.76   | 0.071                | 2.10   | 0.013                |
| 2033-50   | monoamine transporter Slc18a2                                                                                                                                   | 3.00   | 0.000                | 1.54   | 0.051                | 1.51   | 0.009                |
| 0103-63   | (AB025922) Gli1                                                                                                                                                 | 2.99   | 0.000                | 1.26   | 0.233                | 1.08   | 0.560                |
| 2082-36   | (J02809) calmodulin-binding protein/GAP-43                                                                                                                      | 2.89   | 0.000                | 2.36   | 0.000                | 1.65   | 0.025                |
| 0822-11   | (U10355) synaptotagmin 4                                                                                                                                        | 2.73   | 0.000                | 1.61   | 0.018                | 2.28   | 0.019                |
| 0104-46   | No match                                                                                                                                                        | 2.68   | 0.000                | 1.27   | 0.645                | 1.32   | 0.090                |
| 2121-19   | Genomic                                                                                                                                                         | 2.66   | 0.000                | 1.30   | 0.322                | 1.71   | 0.061                |
| 2024-89   | Hermes                                                                                                                                                          | 2.53   | 0.000                | 1.66   | 0.002                | 1.52   | 0.084                |
| 2084-92   | (D45913) leucine-rich-repeat protein                                                                                                                            | 2.46   | 0.000                | 1.18   | 0.222                | 0.97   | 0.877                |
| 4051-37   | (AF031880) light molecular-weight neurofilament                                                                                                                 | 2.46   | 0.000                | 2.49   | 0.017                | 2.06   | 0.140                |
| 2114-89   | Genomic Chr 7                                                                                                                                                   | 2.42   | 0.000                | 1.44   | 0.032                | 1.47   | 0.060                |
| 4091-04   | Genomic                                                                                                                                                         | 2.36   | 0.000                | 1.08   | 0.558                | 1.44   | 0.317                |
| 0223-17   | (AB037848) KIAA1427 protein                                                                                                                                     | 2.35   | 0.000                | 1.93   | 0.082                | 1.79   | 0.010                |
| 0181-87   | No seq                                                                                                                                                          | 2.33   | 0.000                | 2.11   | 0.091                | 1.89   | 0.099                |
| 2021-02   | glucocorticoid induced gene 1, Gig1                                                                                                                             | 2.33   | 0.000                | 1.08   | 0.618                | 1.12   | 0.502                |
| 0054-86   | No seq                                                                                                                                                          | 2.32   | 0.000                | 1.48   | 0.264                | 1.47   | 0.014                |
| 4094-04   | (M16465) calpactin I light chain                                                                                                                                | 2.30   | 0.000                | 2.42   | 0.004                | 1.87   | 0.022                |
| 2073-83   | (AP001748) U2 snRNP auxiliary factor                                                                                                                            | 2.25   | 0.000                | 1.03   | 0.864                | 0.88   | 0.398                |
| 4011-73   | (U62325) FE65-like protein sapiens                                                                                                                              | 2.21   | 0.000                | 1.56   | 0.037                | 1.61   | 0.046                |
| 3191-54   | (X05640) NF-M                                                                                                                                                   | 2.19   | 0.000                | 1.43   | 0.052                | 1.42   | 0.030                |
| 4061-63   | (BC001993) protein phosphatase 4                                                                                                                                | 2.18   | 0.000                | 1.26   | 0.082                | 0.84   | 0.393                |
| 2034-93   | Cyclin D1                                                                                                                                                       | 2.16   | 0.000                | 1.02   | 0.918                | 0.84   | 0.328                |
| 2114-73   | Mus musculus RIKEN cDNA 2310067G05 gene                                                                                                                         | 2.15   | 0.000                | 1.42   | 0.048                | 1.39   | 0.051                |
| 0261-66   | No seq                                                                                                                                                          | 2.14   | 0.000                | 1.10   | 0.457                | 0.91   | 0.566                |
| 0054-78   | No seq                                                                                                                                                          | 2.14   | 0.000                | 0.88   | 0.540                | 1.07   | 0.587                |
| 0222-60   | Trim41                                                                                                                                                          | 2.12   | 0.000                | 1.28   | 0.230                | 1.36   | 0.338                |
| 2114-60   | Mus musculus RIKEN cDNA 2610209L21 gene<br>(2610209L21Rik), mRNA Length = 2352                                                                                  | 2.11   | 0.000                | 1.24   | 0.154                | 1.21   | 0.184                |
| 0083-04   | (AF012271) visual pigment-like receptor                                                                                                                         | 2.10   | 0.000                | 1.10   | 0.587                | 1.09   | 0.572                |
| 4041-04   | (AF033855) myostatin; growth/differentiation factor 8                                                                                                           | 2.05   | 0.000                | 1.58   | 0.071                | 1.84   | 0.019                |
| 4061-62   | (AB048947) synaptotagmin XIII                                                                                                                                   | 2.05   | 0.000                | 1.88   | 0.001                | 1.47   | 0.069                |
| 0823-47   | No seq                                                                                                                                                          | 2.05   | 0.000                | 1.82   | 0.049                | 1.08   | 0.587                |
| 3164-21   | No match                                                                                                                                                        | 2.02   | 0.000                | 1.06   | 0.894                | 1.09   | 0.638                |
| 2083-44   | Genomic Chr 1                                                                                                                                                   | 2.00   | 0.000                | 0.68   | 0.238                | 0.77   | 0.543                |
| 2114-82   | (AJ414378) putative methionyl aminopeptidase                                                                                                                    | 2.00   | 0.000                | 1.87   | 0.077                | 1.57   | 0.028                |
| 4041-19   | (D13635) KIAA0010 ubiquitin-protein isopeptide ligase (E3)                                                                                                      | 1.98   | 0.000                | 1.57   | 0.014                | 1.53   | 0.016                |
| 3223-75   | No seq                                                                                                                                                          | 1.98   | 0.000                | 1.05   | 0.801                | 0.65   | 0.250                |
| 4012-82   | Genomic Chr4, human homologue                                                                                                                                   | 1.97   | 0.000                | 1.03   | 0.871                | 1.36   | 0.041                |
| 2071-68   | Genomic Chr4, human homologue                                                                                                                                   | 1.97   | 0.000                | 1.39   | 0.022                | 1.32   | 0.270                |
| 2071-25   | (D50086) neuropilin                                                                                                                                             | 1.96   | 0.000                | 1.25   | 0.193                | 1.33   | 0.127                |
| 2121-55   | Mus musculus adult male thymus cDNA, RIKEN full-length<br>enriched library, clone: 5830453E13 product: EST, full insert<br>sequence Length = 2695               | 1.94   | 0.000                | 0.96   | 0.830                | 0.90   | 0.552                |
| 0253-32   | No seq                                                                                                                                                          | 1.94   | 0.000                | 1.04   | 0.754                | 1.84   | 0.072                |
| 0242-27   | Mus musculus RIKEN cDNA 1810041L15 gene                                                                                                                         | 1.91   | 0.000                | 1.22   | 0.183                | 0.92   | 0.591                |
| 0191-20   | (AB015132) ubiquitous Kruppel like factor                                                                                                                       | 1.87   | 0.000                | 1.47   | 0.054                | 1.17   | 0.409                |
| 3224-89   | (AB051466) KIAA1679 protein                                                                                                                                     | 1.87   | 0.000                | 1.51   | 0.059                | 1.17   | 0.568                |
| 0233-55   | (U17259) p19                                                                                                                                                    | 1.86   | 0.001                | 1.50   | 0.016                | 1.20   | 0.506                |
| 2084-36   | Mus musculus adult male corpora quadrigemina cDNA, RIKEN<br>full-length enriched library, clone: B230380D18 product:<br>EST, full insert sequence Length = 2092 | 1.84   | 0.000                | 1.13   | 0.428                | 0.96   | 0.799                |
| 2084-31   | No match                                                                                                                                                        | 1.82   | 0.000                | 0.72   | 0.517                | 1.08   | 0.688                |
| 0264-76   | (U17599) ribonucleoprotein                                                                                                                                      | 1.80   | 0.000                | 1.66   | 0.018                | 1.47   | 0.008                |
| 2042-19   | Homologous to Human Chr 10 sequence                                                                                                                             | 1.80   | 0.000                | 1.22   | 0.157                | 1.33   | 0.137                |
| 3204-67   | (M18775) tau microtubule binding protein                                                                                                                        | 1.79   | 0.000                | 1.20   | 0.205                | 0.97   | 0.896                |
| 2052-01   | Genomic                                                                                                                                                         | 1.78   | 0.000                | 1.24   | 0.227                | 1.05   | 0.759                |
| 2014-87   | (Y15924) cystinosin                                                                                                                                             | 1.76   | 0.000                | 1.57   | 0.053                | 1.43   | 0.269                |
| 0104-38   | No match                                                                                                                                                        | 1.74   | 0.000                | 1.30   | 0.295                | 1.11   | 0.678                |
| 4062-84   | Homologous to human genomic sequence                                                                                                                            | 1.73   | 0.000                | 1.39   | 0.058                | 1.08   | 0.568                |
| 3174-95   | Mus musculus phosphofructokinase-1 C isozyme (Pfk1c)                                                                                                            | 1.71   | 0.000                | 0.84   | 0.550                | 0.80   | 0.338                |
| 4071-16   | No seq                                                                                                                                                          | 1.70   | 0.000                | 1.37   | 0.041                | 1.33   | 0.031                |
| 0121-68   | (M17300) cholesterol-regulated protein C                                                                                                                        | 1.70   | 0.000                | 1.42   | 0.118                | 1.45   | 0.358                |
| 3141-43   | Mus musculus adult male medulla oblongata cDNA, RIKEN<br>full-length enriched library, clone: 6330582C22                                                        | 1.70   | 0.000                | 0.56   | 0.094                | 0.78   | 0.201                |
| 4011-29   | Mus musculus adult male hippocampus cDNA, RIKEN full-<br>length enriched library, clone: C630030A18                                                             | 1.65   | 0.000                | 1.15   | 0.291                | 0.89   | 0.507                |

| product:hypothetical protein |                                                                                                                                                                                           |      |       |      |       |      |       |
|------------------------------|-------------------------------------------------------------------------------------------------------------------------------------------------------------------------------------------|------|-------|------|-------|------|-------|
| 0251-51                      | Genomic Chr 1                                                                                                                                                                             | 1.61 | 0.000 | 1.02 | 0.906 | 0.68 | 0.270 |
| 0272-08                      | No seq                                                                                                                                                                                    | 1.60 | 0.000 | 0.86 | 0.659 | 0.91 | 0.673 |
| <b>Cluster B</b>             |                                                                                                                                                                                           |      |       |      |       |      |       |
| 3172-45                      | (AB040905) KIAA1472 protein                                                                                                                                                               | 1.63 | 0.001 | 1.83 | 0.002 | 1.41 | 0.048 |
| 4061-70                      | (X52625) cytosolic 3-hydroxy-3-methylglutaryl coenzyme A synthase                                                                                                                         | 1.58 | 0.000 | 1.76 | 0.020 | 1.88 | 0.051 |
| 4063-10                      | Mus musculus RIKEN cDNA D130012K04 gene (D130012K04Rik)                                                                                                                                   | 1.52 | 0.000 | 2.63 | 0.013 | 1.60 | 0.158 |
| 2082-76                      | (AF179273) alpha-synuclein                                                                                                                                                                | 1.34 | 0.000 | 1.74 | 0.013 | 1.99 | 0.008 |
| 4081-39                      | (AK012551) putative                                                                                                                                                                       | 1.22 | 0.077 | 1.64 | 0.096 | 1.75 | 0.003 |
| 0612-09                      | Homo sapiens KIAA1856 protein (KIAA1856),                                                                                                                                                 | 1.18 | 0.131 | 1.91 | 0.002 | 1.69 | 0.021 |
| 4051-88                      | (AJ132046) ZG29p                                                                                                                                                                          | 1.02 | 0.800 | 1.95 | 0.004 | 1.07 | 0.871 |
| 2034-33                      | Mus musculus RIKEN cDNA 2600016J21 gene (2600016J21Rik)                                                                                                                                   | 0.97 | 0.796 | 2.06 | 0.026 | 1.31 | 0.210 |
| 2062-75                      | (U15734) taipoxin-associated calcium binding protein                                                                                                                                      | 0.91 | 0.127 | 1.94 | 0.010 | 1.14 | 0.463 |
| 4093-96                      | Sumiko/Golga5                                                                                                                                                                             | 0.91 | 0.298 | 1.76 | 0.014 | 0.98 | 0.905 |
| 4103-42                      | (BC006185) follistatin-like                                                                                                                                                               | 0.89 | 0.230 | 1.37 | 0.083 | 2.13 | 0.052 |
| 4032-88                      | Mus musculus hypothetical protein C130008N12, mRNA (cDNA clone MGC:54831 IMAGE:6468505), complete cds Length = 3959                                                                       | 0.89 | 0.179 | 2.07 | 0.145 | 1.62 | 0.085 |
| 4092-89                      | No seq                                                                                                                                                                                    | 0.87 | 0.076 | 1.28 | 0.404 | 1.96 | 0.026 |
| 0821-29                      | No seq                                                                                                                                                                                    | 0.86 | 0.036 | 1.90 | 0.002 | 1.26 | 0.232 |
| <b>Cluster C</b>             |                                                                                                                                                                                           |      |       |      |       |      |       |
| 3133-37                      | Mus musculus 10 days neonate cerebellum cDNA, RIKEN full-length enriched library, clone: B930088P06 product:unclassifiable, full insert sequence Length = 3168                            | 0.66 | 0.302 | 0.48 | 0.277 | 0.44 | 0.425 |
| 0821-30                      | No match                                                                                                                                                                                  | 0.63 | 0.004 | 0.77 | 0.308 | 1.05 | 0.716 |
| 0173-30                      | No match                                                                                                                                                                                  | 0.61 | 0.005 | 0.67 | 0.185 | 0.84 | 0.336 |
| 3224-73                      | Genomic human homologue                                                                                                                                                                   | 0.61 | 0.001 | 0.87 | 0.327 | 1.18 | 0.193 |
| 2092-63                      | Genomic Chr2                                                                                                                                                                              | 0.60 | 0.021 | 0.48 | 0.087 | 0.50 | 0.069 |
| 0054-77                      | Mus musculus RIKEN cDNA 5330429B09 gene (5330429B09Rik), mRNA Length = 1195                                                                                                               | 0.60 | 0.000 | 0.82 | 0.406 | 0.88 | 0.506 |
| 0104-37                      | Genomic Chr 6                                                                                                                                                                             | 0.57 | 0.307 | 0.61 | 0.245 | 0.28 | 0.149 |
| 0192-40                      | M.musculus TSC-22 mRNA                                                                                                                                                                    | 0.56 | 0.000 | 0.87 | 0.360 | 0.91 | 0.612 |
| 2083-77                      | Mus musculus diadenosine triphosphate hydrolase (Fhit) gene, intron 5, partial sequence                                                                                                   | 0.55 | 0.029 | 0.48 | 0.177 | 0.48 | 0.102 |
| 2103-14                      | Mus musculus 3 days neonate thymus cDNA, RIKEN full-length enriched library, clone: A630096G04 product:unclassifiable, full insert sequence Length = 3295, has Human homologue            | 0.55 | 0.015 | 0.86 | 0.373 | 0.97 | 0.868 |
| 0222-55                      | Mus musculus 10 days neonate cerebellum cDNA, RIKEN full-length enriched library, clone: B930031I09 product: EST, full insert sequence Length = 2460                                      | 0.55 | 0.002 | 0.46 | 0.095 | 0.76 | 0.378 |
| 2011-80                      | No match                                                                                                                                                                                  | 0.54 | 0.004 | 0.86 | 0.572 | 1.28 | 0.192 |
| 2122-01                      | (Z49204) NADP transhydrogenase                                                                                                                                                            | 0.54 | 0.000 | 0.65 | 0.094 | 0.95 | 0.802 |
| 2091-37                      | No seq                                                                                                                                                                                    | 0.54 | 0.077 | 0.29 | 0.036 | 0.23 | 0.122 |
| 0052-01                      | No seq                                                                                                                                                                                    | 0.53 | 0.146 | 0.40 | 0.059 | 0.31 | 0.103 |
| 4011-88                      | (BC006058) RIKEN cDNA 2510049I19 gene                                                                                                                                                     | 0.52 | 0.000 | 0.57 | 0.169 | 0.75 | 0.147 |
| 0244-37                      | Mus musculus neuron navigator 1, mRNA (cDNA clone MGC:32500 IMAGE:5055436), complete cds Length = 1992                                                                                    | 0.51 | 0.000 | 0.72 | 0.418 | 0.85 | 0.542 |
| 0081-82                      | No match                                                                                                                                                                                  | 0.47 | 0.000 | 0.88 | 0.625 | 1.28 | 0.140 |
| 2084-37                      | (AF134858) espin                                                                                                                                                                          | 0.46 | 0.048 | 0.12 | 0.468 | 0.35 | 0.132 |
| 2123-87                      | (U51000) DLX-1                                                                                                                                                                            | 0.46 | 0.000 | 0.61 | 0.161 | 0.81 | 0.260 |
| 2083-30                      | No seq                                                                                                                                                                                    | 0.43 | 0.126 | 0.31 | 0.260 | 0.39 | 0.193 |
| 3181-90                      | No match                                                                                                                                                                                  | 0.42 | 0.001 | 0.65 | 0.201 | 1.20 | 0.218 |
| 0051-02                      | Mus musculus 9 days embryo whole body cDNA, RIKEN full-length enriched library, clone: D030067A13 product:unclassifiable, full insert sequence Length = 3152                              | 0.41 | 0.256 | 0.48 | 0.199 | 0.59 | 0.084 |
| 0184-86                      | Mus musculus RIKEN cDNA 2610042L04 gene (2610042L04Rik), mRNA Length = 1992                                                                                                               | 0.40 | 0.000 | 0.97 | 0.801 | 0.93 | 0.707 |
| 2111-40                      | Mus musculus 12 days embryo embryonic body between diaphragm region and neck cDNA, RIKEN full-length enriched library, clone: 9430039D06 product: EST, full insert sequence Length = 3825 | 0.38 | 0.000 | 0.59 | 0.129 | 0.75 | 0.258 |
| 4101-25                      | (BC004964) oxoglutarate dehydrogenase                                                                                                                                                     | 0.33 | 0.525 | 0.41 | 0.212 | ND   | ND    |
| 0054-22                      | Genomic Chr 2                                                                                                                                                                             | 0.31 | 0.002 | 0.41 | 0.096 | 0.43 | 0.208 |
| 2041-54                      | TR                                                                                                                                                                                        | 0.25 | 0.001 | 0.67 | 0.137 | 0.73 | 0.286 |
| <b>Cluster D</b>             |                                                                                                                                                                                           |      |       |      |       |      |       |
| 3134-12                      | No seq                                                                                                                                                                                    | ND   | ND    | 0.36 | 0.177 | 0.49 | 0.509 |
| 0193-73                      | Mus musculus 7 days neonate cerebellum cDNA, RIKEN full-length enriched library, clone: A730028G07                                                                                        | ND   | ND    | 0.10 | 0.297 | 0.50 | 0.177 |
| 2112-49                      | No match                                                                                                                                                                                  | 0.9  | 0.498 | 0.47 | 0.072 | 0.61 | 0.147 |
| 2111-28                      | Genomic                                                                                                                                                                                   | 1.35 | 0.002 | 0.57 | 0.102 | 0.66 | 0.131 |

|         |                                                                                                                                                                                                                            |      |       |      |       |      |       |
|---------|----------------------------------------------------------------------------------------------------------------------------------------------------------------------------------------------------------------------------|------|-------|------|-------|------|-------|
| 3132-54 | (AF007268) fibroblast growth factor                                                                                                                                                                                        | 1.29 | 0.222 | 1.18 | 0.637 | 0.57 | 0.107 |
| 3132-36 | Mus musculus adult male medulla oblongata cDNA, RIKEN full-length enriched library, clone: 6330504A06 product: EST, full insert sequence                                                                                   | 1.20 | 0.062 | 0.98 | 0.960 | 0.53 | 0.088 |
| 2104-16 | (S66385) CREB-binding protein, CBP                                                                                                                                                                                         | 1.18 | 0.037 | 0.82 | 0.403 | 0.52 | 0.087 |
| 3132-71 | Mus musculus RIKEN cDNA 1110014K08 gene (1110014K08Rik), mRNA Length = 1414                                                                                                                                                | 1.16 | 0.765 | 0.47 | 0.071 | 0.42 | 0.453 |
| 2084-04 | Genomic Chr 15                                                                                                                                                                                                             | 1.12 | 0.457 | 0.70 | 0.219 | 0.42 | 0.153 |
| 2083-49 | (AK022823) unnamed protein product                                                                                                                                                                                         | 1.11 | 0.136 | 0.66 | 0.081 | 0.55 | 0.061 |
| 2093-10 | Mus musculus 13 days embryo head cDNA, RIKEN full-length enriched library, clone: 3110023M17 product: hypothetical P-loop containing nucleotide triphosphate hydrolases structure containing protein, full insert sequence | 1.09 | 0.552 | 0.55 | 0.072 | 0.91 | 0.601 |
| 0051-36 | Mus musculus RhoB mRNA, complete cds                                                                                                                                                                                       | 1.08 | 0.512 | 0.57 | 0.074 | 0.75 | 0.197 |
| 0111-55 | No match                                                                                                                                                                                                                   | 1.07 | 0.334 | 0.57 | 0.092 | 0.76 | 0.209 |
| 0173-10 | No seq                                                                                                                                                                                                                     | 1.05 | 0.667 | 0.83 | 0.628 | 0.52 | 0.164 |
| 0123-03 | (M77842) oculorhombin                                                                                                                                                                                                      | 1.04 | 0.590 | 0.58 | 0.061 | 0.54 | 0.109 |
| 0054-28 | No match                                                                                                                                                                                                                   | 1.01 | 0.890 | 0.43 | 0.041 | 0.50 | 0.117 |
| 0053-26 | (U91935) retina-derived POU-domain factor                                                                                                                                                                                  | 1.01 | 0.951 | 0.57 | 0.086 | 0.51 | 0.130 |
| 3132-02 | (AB029019) KIAA1096 protein                                                                                                                                                                                                | 1.01 | 0.940 | 0.57 | 0.064 | 0.61 | 0.332 |
| 0243-04 | Homologous to human genomic sequence                                                                                                                                                                                       | 1.01 | 0.960 | 0.57 | 0.093 | 0.82 | 0.308 |
| 0053-96 | Genomic Chr 2                                                                                                                                                                                                              | 1.01 | 0.967 | 0.56 | 0.175 | 0.50 | 0.121 |
| 0084-95 | (X78443) ribosomal protein L24                                                                                                                                                                                             | 1.00 | 0.979 | 0.52 | 0.087 | 0.77 | 0.268 |
| 0051-91 | (D29640) KIAA0051 Ras GTPase-activating-like protein IQGAP1                                                                                                                                                                | 0.99 | 0.930 | 0.47 | 0.079 | 0.50 | 0.132 |
| 0051-52 | Mus musculus down-regulator of transcription 1 (Dr1), No match                                                                                                                                                             | 0.98 | 0.814 | 0.54 | 0.095 | 0.84 | 0.294 |
| 2111-21 | No match                                                                                                                                                                                                                   | 0.98 | 0.848 | 0.57 | 0.081 | 0.73 | 0.178 |
| 2122-05 | Mus musculus RIKEN cDNA 5830406C15 gene (5830406C15Rik)                                                                                                                                                                    | 0.97 | 0.818 | 0.49 | 0.084 | 0.77 | 0.278 |
| 2092-38 | (AF017806) Zn-15 transcription factor                                                                                                                                                                                      | 0.97 | 0.725 | 0.41 | 0.137 | 0.49 | 0.108 |
| 0191-72 | (AK001782) unnamed protein product                                                                                                                                                                                         | 0.97 | 0.692 | 0.57 | 0.043 | 0.88 | 0.410 |
| 0102-69 | Mus musculus RIKEN cDNA 2210022N24 gene, mRNA                                                                                                                                                                              | 0.97 | 0.773 | 0.89 | 0.705 | 0.34 | 0.107 |
| 3204-03 | (AF044588) protein regulating cytokinesi                                                                                                                                                                                   | 0.96 | 0.749 | 0.50 | 0.110 | ND   | ND    |
| 0114-32 | No seq                                                                                                                                                                                                                     | 0.95 | 0.657 | 0.44 | 0.062 | 0.60 | 0.146 |
| 2042-26 | (AF017445) GDP-L-fucose pyrophosphorylase                                                                                                                                                                                  | 0.95 | 0.612 | 0.55 | 0.062 | 0.97 | 0.882 |
| 2112-83 | (X06656) connexin43 (AA 1-382)                                                                                                                                                                                             | 0.94 | 0.497 | 0.95 | 0.771 | 0.53 | 0.068 |
| 0051-08 | Mus musculus RIKEN cDNA 4933426K21 gene (4933426K21Rik), mRNA                                                                                                                                                              | 0.93 | 0.484 | 0.56 | 0.084 | 0.75 | 0.283 |
| 0234-22 | Mus musculus 10 days neonate cerebellum cDNA, RIKEN full-length enriched library, clone: B930068K11 product: NEPRILYSIN-LIKE PEPTIDASE GAMMA homolog, full insert sequence                                                 | 0.92 | 0.461 | 0.50 | 0.080 | 0.73 | 0.205 |
| 2084-06 | (X07392) ornithine decarboxylase                                                                                                                                                                                           | 0.92 | 0.359 | 0.54 | 0.194 | 0.55 | 0.119 |
| 2092-69 | Mus musculus 16 days neonate cerebellum cDNA, RIKEN full-length enriched library, clone: 9630025H1 product: EST, full insert sequence Length = 2438                                                                        | 0.91 | 0.416 | 0.50 | 0.089 | 0.70 | 0.185 |
| 2083-23 | No match                                                                                                                                                                                                                   | 0.91 | 0.625 | 0.55 | 0.167 | 0.56 | 0.163 |
| 2083-17 | (Y00884) 3.4J polypeptide                                                                                                                                                                                                  | 0.91 | 0.411 | 0.49 | 0.098 | 0.53 | 0.092 |
| 2083-64 | Genomic Chr14                                                                                                                                                                                                              | 0.91 | 0.530 | 0.51 | 0.095 | 0.39 | 0.117 |
| 0052-72 | Mus musculus 6 days neonate head cDNA, RIKEN full-length enriched library, clone: 5430420F09 product: EST, full insert sequence Length = 1791                                                                              | 0.90 | 0.524 | 0.53 | 0.096 | 0.53 | 0.107 |
| 0121-92 | (AF163665) germ cell-less protein                                                                                                                                                                                          | 0.90 | 0.584 | 0.74 | 0.154 | 0.45 | 0.083 |
| 0084-79 | (AF049330) PPAR gamma coactivator                                                                                                                                                                                          | 0.89 | 0.354 | 0.49 | 0.075 | 0.63 | 0.191 |
| 0052-16 | Mus musculus adult male small intestine cDNA, RIKEN full-length enriched library, clone: 2010109C11 product: EST, full insert sequence Length = 991                                                                        | 0.89 | 0.148 | 0.46 | 0.075 | 0.73 | 0.142 |
| 2083-28 | No match                                                                                                                                                                                                                   | 0.89 | 0.430 | 0.40 | 0.141 | 0.28 | 0.378 |
| 0083-42 | No match                                                                                                                                                                                                                   | 0.89 | 0.206 | 0.58 | 0.098 | 0.72 | 0.178 |
| 2092-14 | Genomic Chr 4                                                                                                                                                                                                              | 0.88 | 0.444 | 0.44 | 0.099 | 0.47 | 0.125 |
| 3142-58 | No match                                                                                                                                                                                                                   | 0.87 | 0.179 | 0.54 | 0.056 | 0.67 | 0.453 |
| 0051-05 | (D13643) KIAA0018 protein                                                                                                                                                                                                  | 0.87 | 0.532 | 0.45 | 0.102 | ND   | ND    |
| 2121-24 | No match                                                                                                                                                                                                                   | 0.86 | 0.123 | 0.56 | 0.070 | 0.62 | 0.163 |
| 2091-29 | (AK001486) unnamed protein product                                                                                                                                                                                         | 0.86 | 0.328 | 0.53 | 0.172 | 0.50 | 0.078 |
| 0052-81 | Genomic                                                                                                                                                                                                                    | 0.85 | 0.561 | 0.42 | 0.061 | 0.48 | 0.061 |
| 0051-10 | No match                                                                                                                                                                                                                   | 0.85 | 0.478 | 0.61 | 0.090 | 0.58 | 0.068 |
| 3142-77 | (AL080108) hypothetical protein                                                                                                                                                                                            | 0.85 | 0.144 | 0.54 | 0.073 | 0.67 | 0.125 |
| 0051-29 | (U64849) contains similarity to Pfam domain                                                                                                                                                                                | 0.85 | 0.089 | 0.54 | 0.103 | 0.56 | 0.123 |
| 2083-37 | No match                                                                                                                                                                                                                   | 0.83 | 0.489 | 0.39 | 0.116 | 0.46 | 0.189 |
| 0051-25 | Mus musculus adult male thymus cDNA, RIKEN full-length enriched library, clone: 5830487K18 product: EST, full insert sequence Length = 1420                                                                                | 0.83 | 0.546 | 0.58 | 0.132 | 0.49 | 0.156 |
| 0052-55 | Homologous to human genomic sequence                                                                                                                                                                                       | 0.83 | 0.390 | 0.47 | 0.106 | 0.53 | 0.170 |

|         |                                                                                                                                                                                                  |      |       |      |       |      |       |
|---------|--------------------------------------------------------------------------------------------------------------------------------------------------------------------------------------------------|------|-------|------|-------|------|-------|
| 0192-14 | (AJ010585) PTB-like protein                                                                                                                                                                      | 0.83 | 0.324 | 0.54 | 0.048 | 0.74 | 0.277 |
| 2083-68 | Genomic Chr. 11                                                                                                                                                                                  | 0.82 | 0.189 | 0.52 | 0.167 | 0.43 | 0.184 |
| 2091-03 | No seq                                                                                                                                                                                           | 0.82 | 0.393 | 0.26 | 0.108 | 0.31 | 0.141 |
| 0051-83 | (L28174) disulfide-like protein                                                                                                                                                                  | 0.81 | 0.270 | 0.52 | 0.134 | 0.50 | 0.104 |
| 0051-95 | Mus musculus natural killer tumor recognition protein (Nktr) gene, exons 6, 7 and 8, and partial cds Length = 2859                                                                               | 0.81 | 0.310 | 0.37 | 0.110 | 0.48 | 0.098 |
| 0172-63 | No match                                                                                                                                                                                         | 0.81 | 0.113 | 0.51 | 0.321 | 0.59 | 0.266 |
| 2091-49 | No match                                                                                                                                                                                         | 0.80 | 0.372 | 0.55 | 0.221 | 0.57 | 0.075 |
| 3143-50 | Genomic Chr. 2                                                                                                                                                                                   | 0.80 | 0.240 | 0.56 | 0.199 | 0.58 | 0.406 |
| 0051-66 | No match                                                                                                                                                                                         | 0.80 | 0.370 | 0.55 | 0.056 | 0.75 | 0.206 |
| 2094-56 | No match                                                                                                                                                                                         | 0.80 | 0.106 | 0.51 | 0.087 | 0.46 | 0.128 |
| 2091-63 | Genomic Chr. 4                                                                                                                                                                                   | 0.80 | 0.235 | 0.48 | 0.070 | 0.57 | 0.220 |
| 0051-13 | (L35261) transcriptional regulatory protein A-myb                                                                                                                                                | 0.79 | 0.430 | 0.54 | 0.157 | 0.46 | 0.151 |
| 2092-68 | Mus musculus 15 days embryo head cDNA, RIKEN full-length enriched library, clone: D930012O21 product: EST, full insert sequence Length = 4290                                                    | 0.79 | 0.109 | 0.55 | 0.149 | 0.43 | 0.106 |
| 0054-07 | Mus musculus 11 days embryo spinal cord cDNA, RIKEN full-length enriched library, clone: G630008A16 product:unclassifiable, full insert sequence Length = 3275                                   | 0.79 | 0.229 | 0.50 | 0.088 | 0.60 | 0.072 |
| 3132-82 | Genomic Chr. 2                                                                                                                                                                                   | 0.79 | 0.317 | 0.54 | 0.080 | 0.77 | 0.215 |
| 2083-06 | (U88567) secreted frizzled related protein                                                                                                                                                       | 0.76 | 0.018 | 0.65 | 0.171 | 0.45 | 0.061 |
| 0082-46 | No match                                                                                                                                                                                         | 0.76 | 0.066 | 0.50 | 0.096 | 0.72 | 0.281 |
| 3141-14 | Mus musculus 3 days neonate thymus cDNA, RIKEN full-length enriched library, clone: A630032O12 product:unclassifiable, full insert sequence Length = 1359                                        | 0.74 | 0.070 | 0.49 | 0.112 | 0.61 | 0.163 |
| 0051-39 | No match                                                                                                                                                                                         | 0.74 | 0.076 | 0.43 | 0.083 | 0.51 | 0.063 |
| 0234-79 | (X83569) neuronatin-2                                                                                                                                                                            | 0.73 | 0.025 | 0.56 | 0.077 | 0.82 | 0.301 |
| 0054-10 | Tbx20                                                                                                                                                                                            | 0.72 | 0.040 | 0.46 | 0.081 | 0.57 | 0.206 |
| 0084-44 | No seq                                                                                                                                                                                           | 0.72 | 0.010 | 0.50 | 0.085 | 0.70 | 0.172 |
| 3134-91 | (BC000805) similar to rat nuclear ubiquitous casein kinase 2                                                                                                                                     | 0.72 | 0.144 | 0.45 | 0.137 | ND   | ND    |
| 0121-25 | No seq                                                                                                                                                                                           | 0.71 | 0.251 | 0.43 | 0.195 | 0.67 | 0.438 |
| 2084-53 | Mus musculus 13 days embryo lung cDNA, RIKEN full-length enriched library, clone: D430047D06 product:inferred: probable transposase mariner 1 {Homo sapiens}, full insert sequence Length = 2532 | 0.70 | 0.152 | 0.38 | 0.100 | 0.35 | 0.177 |
| 2052-85 | (AB030190) unnamed protein product                                                                                                                                                               | 0.70 | 0.226 | 0.18 | 0.105 | 0.24 | 0.097 |
| 2091-21 | No seq                                                                                                                                                                                           | 0.67 | 0.193 | 0.34 | 0.099 | 0.38 | 0.109 |
| 0082-30 | (AF106702) testis-enriched protein tyrosine phosphatase                                                                                                                                          | 0.66 | 0.044 | 0.50 | 0.062 | 0.69 | 0.231 |
| 0053-23 | (AB023155) KIAA0938 protein                                                                                                                                                                      | 0.64 | 0.001 | 0.57 | 0.069 | 0.76 | 0.235 |

\*Average wild-type/*brn3b*-null ratios.

Gene ID indicates ID number in the RetinalExpress database (<http://odin.mdacc.tmc.edu/RetinalExpress>).

No match indicates no sequence match in GenBank.

No seq. indicates no sequence available for the clone.

Genomic indicates only matches to genomic sequences, in GenBank; mouse chromosome location is given where possible.

ND indicates no data.
